# Supplementary material for: Fabrication and mechanical properties of microchambers made of polyelectrolyte multilayers
Source: Royal Society of Chemistry journal article supplement (doi:10.1039/c1sm05101f), 2011-01-01
Supplement: c1sm05101f.pdf [file c1sm05101f.pdf]

Supplementary Information

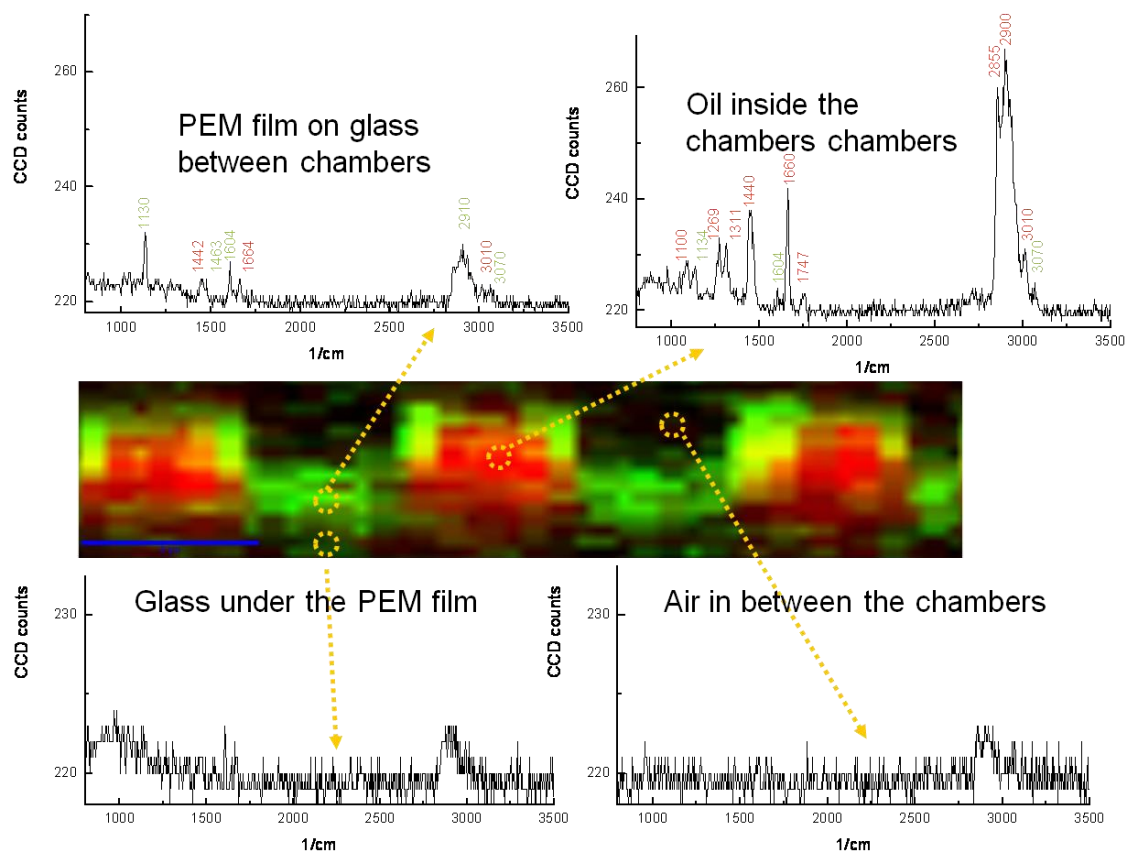

**Figure 1.** Raman spectra taken from different parts of the PEM chambers filled with sunflower oil. Bands marked with green correspond to PEMs; bands marked with red correspond to sunflower oil.
